# Supplementary material for: Recycled Battery Separators as Low-cost, Selective, and Reusable Adsorbents for Methylene Blue
Source: Research Square preprint supplement (doi:10.21203/rs.3.rs-7868155/v1), 2025-10-21
Supplement: Supplementary file 1 [file 570f138df6dc7414d4e37c19.docx]

**SUPLEMENTARY MATERIAL**

**Figure S1.** Temkin isotherm plot ​ versus ​ for the adsorption of MB on the recycled separator: EE (black, steeper slope) and LEC (red, shallower slope).

**Figure S2.** Freundlich plot ​ versus ​ for the adsorption of MB on EE (black, shallower slope) and LEC (red, steeper slope).

**Figure S3.**The van’t Hoff plots (ln K vs 1/T) for MB adsorption on the recycled separator, comparing EE (black) and LEC (red) in the 10–40 °C range.

**Figure S4.** Reusability of the EE separator: 5 ppm MB removal over 10 adsorption–desorption cycles (≥ 92%).
